# Supplementary material for: The Effect of including a Mixed-Enzyme Product in Broiler Diets on Performance, Metabolizable Energy, Phosphorus and Calcium Retention
Source: MDPI journal article supplement (doi:10.3390/ani14020328), 2024-01-21
Supplement: s1 [file s1]

**Table S1.** Analytical composition of the experimental diets.

| <b>Diet component</b>     | <b>Positive<br/>Control</b> | <b>Negative<br/>Control</b> | <b>ASC<br/>200 g/Mt</b> | <b>ASC<br/>400 g/Mt</b> |
|---------------------------|-----------------------------|-----------------------------|-------------------------|-------------------------|
| Dry matter (%)            | 87.5                        | 87.1                        | 87.1                    | 87.1                    |
| Ash (g/kg dw)             | 77                          | 66                          | 72                      | 64                      |
| Crude protein (g/kg dw)   | 267                         | 275                         | 271                     | 274                     |
| Crude fiber (g/kg dw)     | 26                          | 24                          | 27                      | 27                      |
| Crude fat (g/kg dw)       | 77                          | 58                          | 53                      | 60                      |
| Titanium oxide (mg/kg dw) | 4.89                        | 4.75                        | 4.73                    | 4.66                    |
